# Supplementary material for: Genetic Code Expansion and a Photo-Cross-Linking Reaction Facilitate Ribosome Display Selections for Identifying a Wide Range of Affinity Peptides
Source: MDPI journal article supplement (doi:10.3390/ijms242115661), 2023-10-27
Supplement: s1 [file s1]

## ***Supplementary Materials:***

# **Genetic Code Expansion and a Photo-Cross-Linking Reaction Facilitate Ribosome Display Selections for Identifying a Wide Range of Affinity Peptides**

Takuto Furuhashi,<sup>1,2</sup> Kensaku Sakamoto,<sup>3,4</sup> and Akira Wada<sup>1,2,3,\*</sup>

<sup>1</sup>Graduate School of Medical Life Science, Yokohama City University, 1-7-29 Suehiro-cho, Tsurumi-ku, Yokohama, Kanagawa 230-0045, Japan

<sup>2</sup>Laboratory for Advanced Biomolecular Engineering, RIKEN Center for Biosystems Dynamics Research, 1-7-22 Suehiro-cho, Tsurumi-ku, Yokohama, Kanagawa 230-0045, Japan

<sup>3</sup>Laboratory for Nonnatural Amino Acid Technology, RIKEN Center for Biosystems Dynamics Research, 1-7-22 Suehiro-cho, Tsurumi-ku, Yokohama, Kanagawa 230-0045, Japan

<sup>4</sup>Department of Drug Target Protein Research, School of Medicine, Shinshu University, 3-1-1 Asahi, Matsumoto, Nagano 390-8621, Japan

\* E-mail: awada@riken.jp (A.W.)

---

## ***Contents:***

**Table S1 ----- pS2**

**Figure S1 – Figure S4 ----- pS3 – pS4**

**Table S1.** Oligonucleotides for constructing double strand DNA fragments that encode various peptides

| Name             | Sequence                                                |
|------------------|---------------------------------------------------------|
| FLAG-s           | AGGCCGACTACAAGGACGATGACGACAAGGGCCAGCT                   |
| FLAG-as          | TGGCCCTTGTCGTCATCGTCCTTGATGTCGGCCTGCA                   |
| V5-s             | AGGCCGGTAAGCCAATCCCAAACCCGCTCCTCGGTCTGGATTCTACTGGCCAGCT |
| V5-as            | TGGCCAGTAGAATCCAGACCGAGGAGCGGGTTTGGGATTGGCTTACCGGCCTGCA |
| TAG-FLAG-s       | AGGCCTAGGACTACAAGGACGATGACGACAAGGGCCAGCT                |
| TAG-FLAG-as      | TGGCCCTTGTCGTCATCGTCCTTGATGTCCTAGGCCTGCA                |
| TAG-FLAG(K3A)-s  | AGGCCTAGGACTACGCTGACGATGACGACAAGGGCCAGCT                |
| TAG-FLAG(K3A)-as | TGGCCCTTGTCGTCATCGTCAGCGTAGTCCTAGGCCTGCA                |
| TAG-FLAG(Y2A)-s  | AGGCCTAGGACGCTAAGGACGATGACGACAAGGGCCAGCT                |
| TAG-FLAG(Y2A)-as | TGGCCCTTGTCGTCATCGTCCTTAGCGTCCTAGGCCTGCA                |

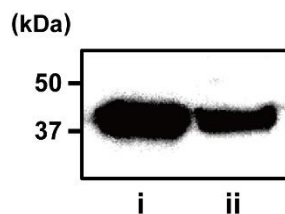

**Figure S1.** Western blot analysis of the expression levels of FLAG peptide and V5 peptide fused with a protein spacer (PS) and a hexa-histidine tag (6H), FLAG-PS-6H (i) and V5-PS-6H (ii).

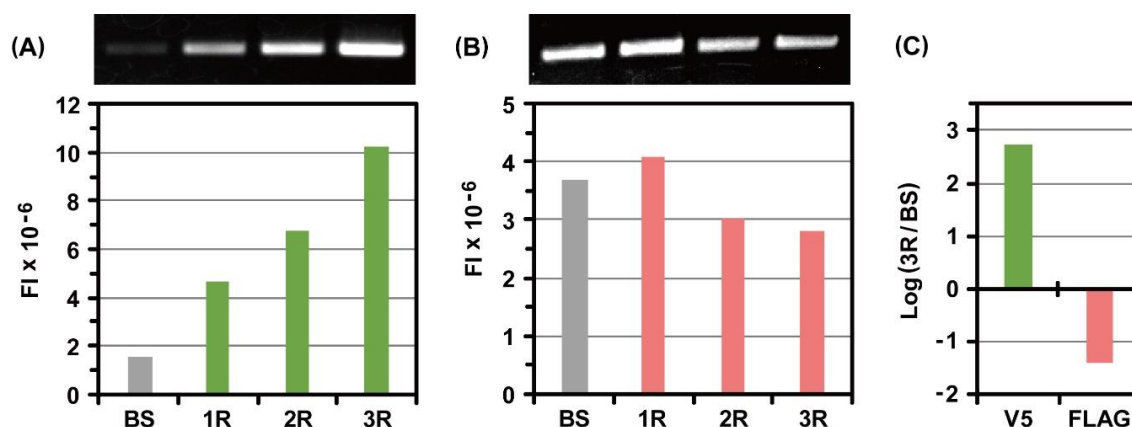

**Figure S2.** Electrophoretic gel analysis of RT-PCR products derived from the mRNAs that encode (A) V5 peptide or (B) FLAG peptide after ribosome display selection against monoclonal anti-V5 peptide antibodies immobilized on beads. FI = fluorescent intensity, BS = before selection, 1R = the first round of selection, 2R = the second round of selection, and 3R = the third round of selection. In the initial mRNA pool, the molar amount of mRNA of the V5 peptide of interest was  $1/10^5$  times that of the FLAG peptide as its counterpart. (C) Augmentation of V5 peptide and reduction of FLAG peptide after the third round of selection. The RT-PCR products were quantified on the basis of the fluorescent band intensities in the electrophoretic gel image.

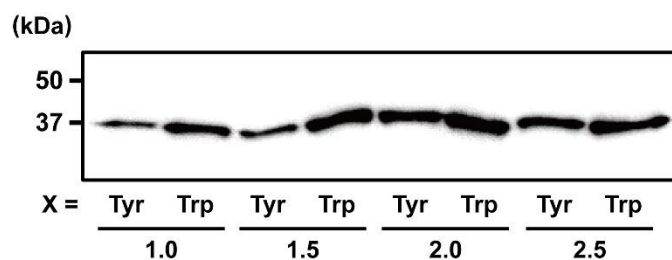

**Figure S3.** Western blot analysis of the expression levels of X-FLAG peptides (X = Tyr and Trp) depended on the quantity and type of synthetic X-tRNA<sup>UAG</sup>. To generate X-FLAG peptides fused with a protein spacer (PS) and a hexa-histidine tag (6H), Tyr-FLAG-PS-6H and Trp-FLAG-PS-6H, in vitro translations of the mRNA encoding the sequence of UAG-FLAG-PS-6H were performed in the presence of Tyr-tRNA<sup>UAG</sup> and Trp-tRNA<sup>UAG</sup>, respectively.

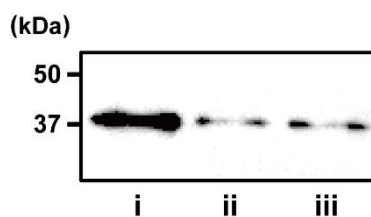

**Figure S4.** Western blot analysis of the expression levels of photo-cross-linkable FLAG variant peptides fused with a protein spacer (PS) and a hexa-histidine tag (6H), *p*Bzo-Phe-FLAG-PS-6H (i), *p*Bzo-Phe-FLAG(K3A)-PS-6H (ii), and *p*Bzo-Phe-FLAG(Y2A)-PS-6H (iii). To generate each peptide-fused protein, in vitro translation of the mRNA encoding the sequence of UAG-FLAG-PS-6H, UAG-FLAG(K3A)-PS-6H, or UAG-FLAG(Y2A)-PS-6H was conducted in the presence of *p*Bzo-Phe-tRNA<sup>UAG</sup>.
